# Supplementary material
Source: PubMed Central journal article supplement (PMC4066477)
Supplement: 1404269111_pnas.201404269SI.pdf [file 1404269111_pnas.201404269SI.pdf]

# Supporting Information

Harkcom et al. 10.1073/pnas.1404269111

## SI Materials and Methods

### Reagents and Materials.

| Reagent                                               | Supplier          | Catalog no. |
|-------------------------------------------------------|-------------------|-------------|
| Paclitaxel                                            | Sigma-Aldrich     | T1912       |
| Vinblastine                                           | Sigma-Aldrich     | V1377       |
| Colchicine                                            | Sigma-Aldrich     | 9754        |
| Nocodazole                                            | Sigma-Aldrich     | M1404       |
| Vincristine                                           | Sigma-Aldrich     | V8879       |
| Vindesine                                             | Santa Cruz        | Sc205883    |
| Vinorelbine                                           | Sigma-Aldrich     | V2264       |
| Jasplakinolide                                        | EMD Biosciences   | 420127      |
| Tubulin                                               | Cytoskeleton      | TL238       |
| X-tremeGENE HP                                        | Roche             | 6366244001  |
| Nicotinamide adenine dinucleotide (NAD <sup>+</sup> ) | Affymetrix        | 19439       |
| nicotinamide mononucleotide (NMN)                     | Sigma-Aldrich     | N3501       |
| Lactate dehydrogenase                                 | Sigma-Aldrich     | L7525       |
| Diaphorase                                            | Affymetrix        | 14615       |
| CellROX Deep Red                                      | Life Technologies | C10422      |
| $\alpha$ -Tocopherol                                  | Sigma-Aldrich     | T3251       |
| Ascorbic Acid                                         | Sigma-Aldrich     | A4544       |
| MTT Assay                                             | Roche             | 11465007001 |
| Multitox Fluor Cytotoxicity Assay                     | Promega           | G9200       |
| Caspase-Glo 3/7 Assay                                 | Promega           | G8090       |
| Alexa Fluor 568 Phalloidin                            | Life Technologies | A12380      |

### Antibodies.

| Antibody                  | Source            | Catalog no. |
|---------------------------|-------------------|-------------|
| Tyrosinated Tubulin       | Novus Biologicals | NB600-506   |
| Acetylated Tubulin        | Sigma-Aldrich     | T7451       |
| $\alpha$ -Tubulin         | GenScript         | A01410      |
| $\beta$ -Actin            | GenScript         | A00702      |
| Sirtuin-3 (SIRT3)         | Cell Signaling    | 5490        |
| Donkey Anti-Rat Alexa 488 | Invitrogen        | A-21206     |
| Donkey Anti-Mouse HRP     | GE Healthcare     | NA931       |
| Donkey Anti-Rabbit HRP    | GE Healthcare     | NA934       |

**EB Comet Imaging Assays.** MCF-7 cells were plated on 35-mm glass bottom No. 1.5 dishes (MatTek) and infected with GFP-EB1 $\Delta$ C lentiviral particles. EB1 $\Delta$ C (referred to throughout the manuscript as EB1 for simplicity) is an EB1 construct truncated at amino acid 248 that does not interact with other +TIP proteins (1). This construct had a better signal-to-noise ratio than full-length EB1, as determined empirically. The cells were imaged 2 d postinfection to measure the dynamicity of microtubules ends labeled with GFP-EB1 $\Delta$ C. Cells were pretreated with vehicle (water) or 10 mM NAD<sup>+</sup> for 2 h at 37 °C before imaging. Images were acquired every 0.5 s for a total of 1 min for each time-lapse movie.

Dissociated embryonic day (E) 14.5 rat dorsal root ganglia (DRG) sensory neurons ( $\sim 4 \times 10^4$  cells per device applied to the cell body compartment) were cultured in microfluidic devices on coated, glass-bottom dishes as described previously (2). EB3 imaging was performed using human EB3 following protocols described previously (3). The neurons were infected with GFP-EB3 lentiviral particles immediately after plating. On days in vitro (DIV) 4–5, the axonal compartment was imaged using live-cell

confocal microscopy (as described below) to measure the dynamicity of microtubule ends labeled with GFP-EB3. When indicated, axons were transected by aspiration of the cell bodies. Images were acquired every 0.5 s for a total of 1 min for each time-lapse movie, and analysis was performed as described below.

### Computational Analysis of MT Dynamics Using End-Binding Proteins.

All image analysis was performed using ClusterTrack, an algorithm that has been described in detail previously (3, 4). In brief, this approach can track thousands of end-binding (EB)-EGFP comets that are visible in images within a time-lapse sequence. Imaging these comets allows the detection of spatial patterns of MT dynamics. The algorithm uses spatiotemporal clustering of EB-EGFP growth tracks to infer MT behaviors during phases of pausing and shortening. EB comet detection is accomplished by band-pass filtering, which enhances image features that have the expected size of an EB comet. This approach reduces higher-frequency noise and lower-frequency structures that represent larger aggregates of fluorescent protein. The algorithm is robust against variations in comet lengths, both within videos and between videos. The feature detector delivers not only the position of each comet in a frame but also the eccentricity and orientation of the comets. The latter is used as a directional cue in the subsequent tracking of comets from one frame to the next.

The cost of an individual assignment is defined in statistical terms as the Mahalanobis distance between projected and extracted comets. Detected EB-EGFP comets are tracked using a Kalman filter-based multiobject tracking algorithm (5). Clustering of colinear growth tracks that likely belong to the same microtubule is performed by solving a linear assignment problem (6), which identifies the globally optimal positional correspondences between the endpoints of terminating tracks and the start points of newly initiated tracks. Every potential assignment is characterized by a cost of linking. A pairing between a track termination and a track initiation is considered only if these two events are separated by less than 15 s or another user-specified time-lag.

Furthermore, the track initiation has to fall within either one of two cone-shaped, geometrical search regions. The choice of the forward cone with an opening half-angle of 60° is motivated by the observation that during pauses or out of focus movements, microtubules sometimes undergo significant lateral displacements and directional changes, especially at the cell periphery. The longer the gap duration, the larger is the probability for a lateral step and directional change. In contrast, the backward cone has an opening half-angle of 10° only, motivated by the observation that microtubule rescues generally follow the growth track before the catastrophe. By construction, this assignment is spatially and temporally global, which leads to a high level of robustness. Competing pairings are weighed against one another via a cost function that prefers colinear track pairings with a short gap distance.

Parameters in ClusterTrack were as follows:  $s_1 = 1.25$ ,  $s_2 = 3.5$ ,  $k_1 = 3.5$ ,  $k_2 = 1$ , search radius = 7.5 pixels. Remaining conditions were set to defaults. Accuracy of comet tracking was verified by visual inspection of time-lapse movies. All parameters were calculated per cell. For each condition, 15 videos containing one or two cells are acquired. For statistical analysis, we used a permutation  $t$  test (200 repetitions), which makes no assumptions about normality of the data, to compare differences in the mean parameter values (4).

### Preparation of Microfluidic Devices for Compartmentalization of Axons.

The polydimethylsiloxane microfluidic devices with 450- $\mu$ m

microgrooves were prepared as described previously (2, 7). The devices were cleaned, sterilized, and reversibly affixed to plastic tissue culture dishes (Corning) coated with poly-L-lysine (Trevigen) and 5  $\mu\text{g}/\text{mL}^{-1}$  laminin (Trevigen).

**Compartmentalized Neuronal Culture in Microfluidic Devices.** DRG neurons and explants were prepared as described previously (8, 9). A total of 150  $\mu\text{L}$  per reservoir of DRG culture medium [Neurobasal supplemented with 2% (vol/vol) B27 (Invitrogen), 2 mM Glutamax (Invitrogen), 1 $\times$  penicillin/streptomycin (Invitrogen), 10  $\mu\text{M}$  5-fluorodeoxyuridine (Sigma), and 50  $\text{ng}/\text{mL}^{-1}$  2.5S NGF (Invitrogen)] was added to the distal axonal compartment followed by plating  $\sim 4 \times 10^4$  dissociated E14.5 rat DRG neurons in the cell body compartment. After a 15 min incubation to allow neuronal attachment to the tissue culture dishes, culture medium was added to the cell body compartment.

**Taxol-Mediated Axon Protection in Compartmentalized Chambers.** Dissociated E14.5 rat DRG neurons ( $\sim 4 \times 10^4$  cells per device applied to the cell body compartment) were cultured in microfluidic devices on coated plastic dishes. On DIV5, taxol (1  $\mu\text{M}$ ) was added to the axonal compartment. The cells were then transected by flushing the cell bodies from the cell body compartment by aspiration. The compartment was flushed twice with PBS to ensure all cell bodies were removed. Removal of cell bodies was confirmed by inspecting the cell body compartment by phase-contrast microscopy. Phase-contrast images (20 $\times$  objective) of the distal axonal compartment were acquired at the indicated time points. Axon degeneration was analyzed by calculating the degeneration index, as previously described (100 axons from three fields per condition) (10). Briefly, following background subtraction to improve the accuracy of thresholding, the phase-contrast images were thresholded and converted to binary images. The total axonal area was defined as the number of black pixels. As degenerated axons acquire a particulate structure because of fragmentation, degeneration was detected using the particle analyzer module in Fiji (11). The degeneration index is the ratio of particulate axonal area over total axon area.

**Transection Assay in DRG Explant Cultures.** E14.5 rat DRG explants were plated (one per well) in coated 24-well plastic dishes. On DIV5, the axons were transected using a pipette tip to remove the cell bodies. Immediately after transection, 1  $\mu\text{M}$  taxol or vehicle (DMSO) was added, and phase-contrast images (20 $\times$  objective) of the axons were acquired. The extent of axon degeneration was determined by calculating the degeneration index as described above (100 axons from three fields per condition) (10).

**In Vitro Tubulin Polymerization Assay.** The assay was performed as per the manufacturer's (Cytoskeleton, BK006P) instructions. Briefly, purified bovine tubulin (3  $\text{mg}/\text{mL}$ ) in tubulin polymerization buffer (80 mM Pipes pH 6.9, 2 mM  $\text{MgCl}_2$ , 0.5 mM EGTA, and 3% glycerol) was mixed with 10 mM  $\text{NAD}^+$ , 10  $\mu\text{M}$  taxol, or DMSO in a half-area 96-well plate. Absorbance at 340 nm was monitored for 1 h. An increase in absorbance indicates an increase in polymerized tubulin. Two technical replicates were performed for each of three independent experiments.

**Live-Cell Protease Viability Assay.** To assess cell viability, we used the MultiTox-Fluor Multiplex Cytotoxicity Assay (Promega G9200) according to the manufacturer's protocol. Briefly, we plated 10,000–15,000 cells in a 96-well plate and treated the cells with the indicated compounds. After culturing for the indicated amount of time, we added the viability/cytotoxicity reagent, glycy-L-phenylalanyl-aminofluorocoumarin (GF-AFC). The substrate enters intact cells, where it is cleaved by a live-cell protease to generate a fluorescent compound. Upon loss of cell-membrane integrity, the protease becomes inactive, and is thus used as a marker for cell viability.

Cells were incubated with the reagent for 45 min at 37  $^\circ\text{C}$ , and fluorescence was measured at 400<sub>ex</sub>/505<sub>em</sub>.

**MTT Viability Assay.** As an alternative cell viability assay, we used the MTT Cell Proliferation Kit (Roche 11 465 007 001) according to the manufacturer's protocol. Briefly, we plated  $\sim 5,000$  cells in a 96-well plate and treated the cells with the indicated compounds. After culturing for the indicated time, we added the MTT labeling reagent to a final concentration of 0.5  $\text{mg}/\text{mL}$  and incubated for 4 h at 37  $^\circ\text{C}$ . We then added solubilization buffer and incubated over night at 37  $^\circ\text{C}$ . Finally, we measured absorbance at 570 nm with a 680-nm reference wavelength. This assay measures the conversion of MTT, a tetrazolium dye, to insoluble formazan, which only occurs in metabolically active cells.

**Apoptosis Assay.** To measure apoptosis, we used the Caspase-Glo 3/7 assay (Promega G8090) according to the manufacturer's protocol. Briefly, we plated 10,000–15,000 cells in a 96-well plate and treated the cells with the indicated compounds. After culturing for the indicated amount of time, we added the caspase-3/-7 substrate, which contains the tetrapeptide sequence DEVD. Caspase cleavage of the substrate produces a luminescent signal. After a 45-min incubation, we monitored luminescence as a readout of apoptosis.

**Reactive Oxygen Species Assay.** To measure reactive oxygen species (ROS) levels, we used the CellROX Deep Red Reagent (Life Technologies C10422) according to the manufacturer's protocol. Briefly, we plated  $\sim 10,000$  cells in a 96-well plate and added the appropriate treatments. After incubating, we added the CellROX reagent along with Hoechst 3334 dye (1  $\mu\text{g}/\text{mL}$ ), incubated for 30 min at 37  $^\circ\text{C}$ , and washed twice with warm PBS. Afterward, fluorescence was monitored at 350<sub>ex</sub>/461<sub>em</sub> (Hoechst) and 640<sub>ex</sub>/665<sub>em</sub> (CellROX). ROS signal was normalized to cell number (Hoechst signal).

**Western Blotting.** Cells were lysed in RIPA buffer (50 mM Tris-HCl pH 8.0, 150 mM NaCl, 1% Nonidet P-40, 0.5% sodium deoxycholate, 0.1% SDS, and 1 $\times$  Roche protease inhibitor mixture) and sonicated. Any remaining insoluble debris was pelleted, and the supernatant was saved. Proteins were resolved by 4–12% SDS/PAGE and transferred to a PVDF membrane. The membrane was blocked with 3% (wt/vol) nonfat milk in PBS containing 0.05% Tween-20 (PBST), probed with primary and secondary antibodies in 1% nonfat milk in PBST, and detected using ECL Prime reagent (GE Healthcare). Images were acquired using a ChemiDoc MP system and Image Lab software version 4.0.1 (Bio-Rad Laboratories). Quantification was performed using Image Lab.

**Image Acquisition and Data Analysis.** Fluorescent and phase-contrast images were acquired on a Nikon Eclipse TE2000-E microscope equipped with a CoolSnap HQ2 CCD camera. Within each experiment, exposure times were kept constant and in the linear range throughout. Phase images were acquired using a 20 $\times$  Ph1 ADL (NA = 0.4) air objective. Fluorescent images were acquired using a 60 $\times$  Plan-Apochromat (NA = 1.4) oil-immersion objective. Stacks of images were taken and 3D deconvolution was performed using AutoDeblur X (Media Cybernetics). Fixed sample images were taken at 25  $^\circ\text{C}$ , and live cell images were taken at 37  $^\circ\text{C}$  in an environmental chamber containing 5%  $\text{CO}_2$ (g). Images were acquired using NIS-Elements Advanced Research v3.1 software (Nikon), and data analysis was performed using Fiji (11), GraphPad Prism version 5.0 (GraphPad Software), and MATLAB (MathWorks).

Live-cell confocal microscopy was performed with a Hamamatsu Orca R2 camera (Middlesex) mounted onto a CSU-X1 (Yokogawa Electric Corporation) spinning disk head on a Zeiss SD Observer I equipped with a 100 $\times$  Plan-Apochromat (NA = 1.46) oil objective (Carl Zeiss).



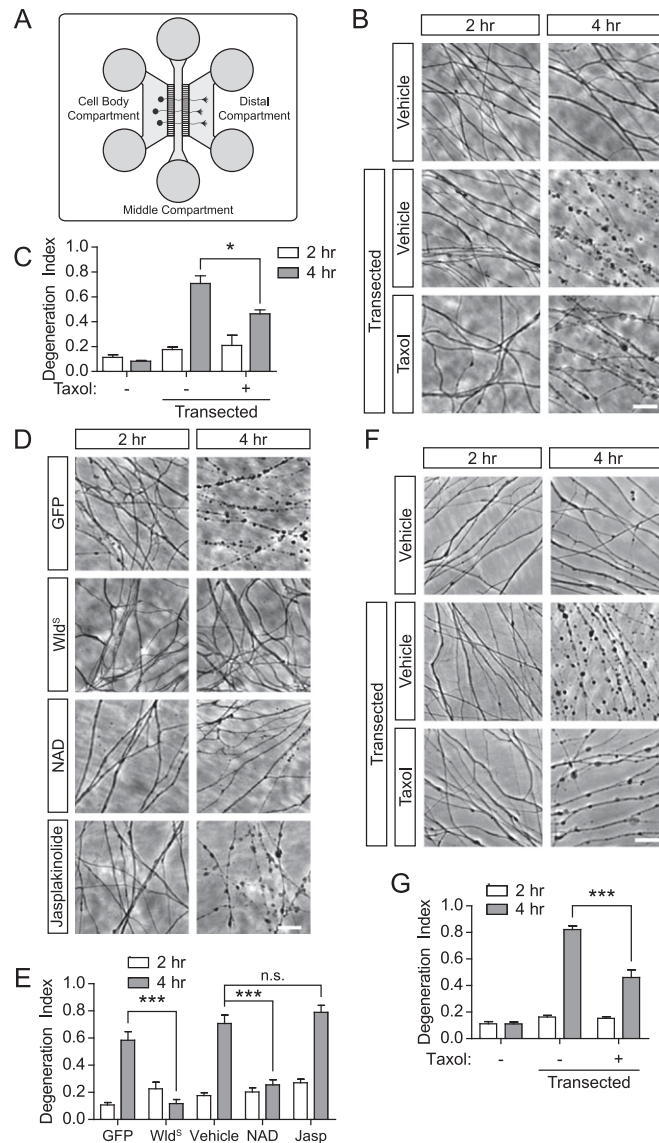

**Fig. S1.** Microtubule stabilization protects from axonal degeneration. (A) Schematic of microfluidic chambers. We used microfluidic chambers for culturing neurons primarily because it provides a simple, consistent way to transect axons and monitor axonal degeneration, while also allowing us to efficiently infect all neurons with lentivirus. Dissociated neurons are readily infected in a homogeneous manner. We therefore performed many of our experiments using neurons cultured in microfluidic devices. In this culturing system, neurons are applied to the cell body compartment (left side of image), and axons spontaneously grow through the 5- $\mu\text{m}$ -wide, 450- $\mu\text{m}$ -long microgrooves into the central compartment, and then through to the distal compartments (indicated). Our laboratory has used these devices extensively (1–5). After axons grow through the grooves, the cell bodies can be sheared off the axons by flushing buffer through the cell body compartment. This transection protocol initiates axonal degeneration. (B) Taxol delays axon degeneration. Compounds that affect diverse signaling pathways were screened for their effect of axonal degeneration. In these experiments, dissociated rat E14.5 DRG neurons were cultured in microfluidic chambers. On DIV5, axons were transected by flushing buffer through the cell body compartment, which washes away the cell bodies. Axons in the distal compartment were imaged 2 h and 4 h posttransection. In control, untransected neurons, axons appear morphologically intact at all time points. In transected neurons, axons appear intact at 2 h, but blebbing and fragmentation are seen by 4 h. Application of taxol (1  $\mu\text{M}$ ) to the axonal compartment at the time of transection markedly reduces axonal degeneration at 4 h. This finding suggests that stabilization of microtubules delays axon degeneration. (C) Quantification of axon degeneration in B. Degeneration index was calculated in Fiji (6) by first thresholding each image and measuring the total axonal area. Then, images were thresholded using the particle analyzer, which selects axonal fragments but not linear sections, and the ratio of axon fragments to total axon area is referred to as the degeneration index (7). For each condition, three nonoverlapping images were acquired for  $n = 3$  replicates. Bar graph represents mean  $\pm$  SEM;  $P < 0.05$ ;  $**P < 0.01$  (one-way ANOVA with Tukey's post hoc test). (D) NAD<sup>+</sup> treatment and expression of Wallerian degeneration slow (Wld<sup>Δ</sup>) protein, but not treatment with stabilizers of actin polymers, delay axonal degeneration. We wondered if the axon-protective effect of taxol could be recapitulated by any compound that stabilizes the cytoskeleton. To test this, we used the actin stabilizer, jasplakinolide (50 nM). E14.5 DRG neurons were cultured in microfluidic chambers and transected at DIV4, and phase-contrast images were acquired at 2 and 4 h. As can be seen in control axons, degeneration is evident at 4 h, and this is blocked by expression of Wld<sup>Δ</sup> or by treatment with NAD<sup>+</sup> (5 mM), as expected. However, treatment with jasplakinolide failed to delay axonal degeneration. These data support the idea that there is a unique role for microtubules in regulating the onset of axonal degeneration. (E) Quantification of the results in D. Vehicle control results from B are included for clarity. For each condition, three nonoverlapping images were acquired for  $n = 3$  replicates. Bar graph represents mean  $\pm$  SEM;  $***P < 0.001$  (one-way ANOVA with Tukey's post hoc test). (F) The axon-protective effects of taxol are seen in DRG explant cultures. In B and C, we show that taxol delays axonal degeneration using DRG neurons prepared in microfluidic chambers. However, we sought to confirm that taxol has the same effect in the more widely used explant culture model of axonal degeneration. E14.5 rat DRG explants were cultured for 4

Legend continued on following page

DIV, and then axons were transected and the explant was removed, resulting in removal of the cell bodies. Axons remain on the plastic. As can be seen, no degeneration occurs in untransected axons at either 2 or 4 h. However, in transected axons, significant degeneration is observed by 4 h. This effect was blocked by inclusion of taxol (1  $\mu$ M) at the time of transection. Thus, taxol delays axonal degeneration in both explant cultures and microfluidic chambers. It should be noted that unlike Wld<sup>S</sup>, which exhibits a persistent axonal protection that lasts at least 24 h (8, 9), the effects of taxol are lost by 8 h in these cultures. Taxol is known to have its own axon degeneration-inducing effects (10). Thus, we suspect that taxol transiently protects axons, but the overall impairment of microtubule dynamics eventually elicits axon degeneration on its own. (G) Quantification of results in F. For each condition, three nonoverlapping images were acquired for  $n = 3$  replicates. Bar graph represents mean  $\pm$  SEM; \*\*\* $P < 0.001$  (one-way ANOVA with Tukey's post hoc test). (Scale bars, 20  $\mu$ m in B, D, and F.)

1. Hengst U, Deglincerti A, Kim HJ, Jeon NL, Jaffrey SR (2009) Axonal elongation triggered by stimulus-induced local translation of a polarity complex protein. *Nat Cell Biol* 11(8):1024–1030.
2. Cohen MS, Ghosh AK, Kim HJ, Jeon NL, Jaffrey SR (2012) Chemical genetic-mediated spatial regulation of protein expression in neurons reveals an axonal function for wld(s). *Chem Biol* 19(2):179–187.
3. Cohen MS, Bas Orth C, Kim HJ, Jeon NL, Jaffrey SR (2011) Neurotrophin-mediated dendrite-to-nucleus signaling revealed by microfluidic compartmentalization of dendrites. *Proc Natl Acad Sci USA* 108(27):11246–11251.
4. Walker BA, et al. (2012) Reprogramming axonal behavior by axon-specific viral transduction. *Gene Ther* 19(9):947–955.
5. Ji S-J, Jaffrey SR (2012) Intra-axonal translation of SMAD1/5/8 mediates retrograde regulation of trigeminal ganglia subtype specification. *Neuron* 74(1):95–107.
6. Schindelin J, et al. (2012) Fiji: An open-source platform for biological-image analysis. *Nat Methods* 9(7):676–682.
7. Sasaki Y, Vohra BPS, Lund FE, Milbrandt J (2009) Nicotinamide mononucleotide adenyl transferase-mediated axonal protection requires enzymatic activity but not increased levels of neuronal nicotinamide adenine dinucleotide. *J Neurosci* 29(17):5525–5535.
8. Araki T, Sasaki Y, Milbrandt J (2004) Increased nuclear NAD biosynthesis and SIRT1 activation prevent axonal degeneration. *Science* 305(5686):1010–1013.
9. Wang J, et al. (2005) A local mechanism mediates NAD-dependent protection of axon degeneration. *J Cell Biol* 170(3):349–355.
10. Wang MS, Davis AA, Culver DG, Glass JD (2002) Wld<sup>S</sup> mice are resistant to paclitaxel (taxol) neuropathy. *Ann Neurol* 52(4):442–447.

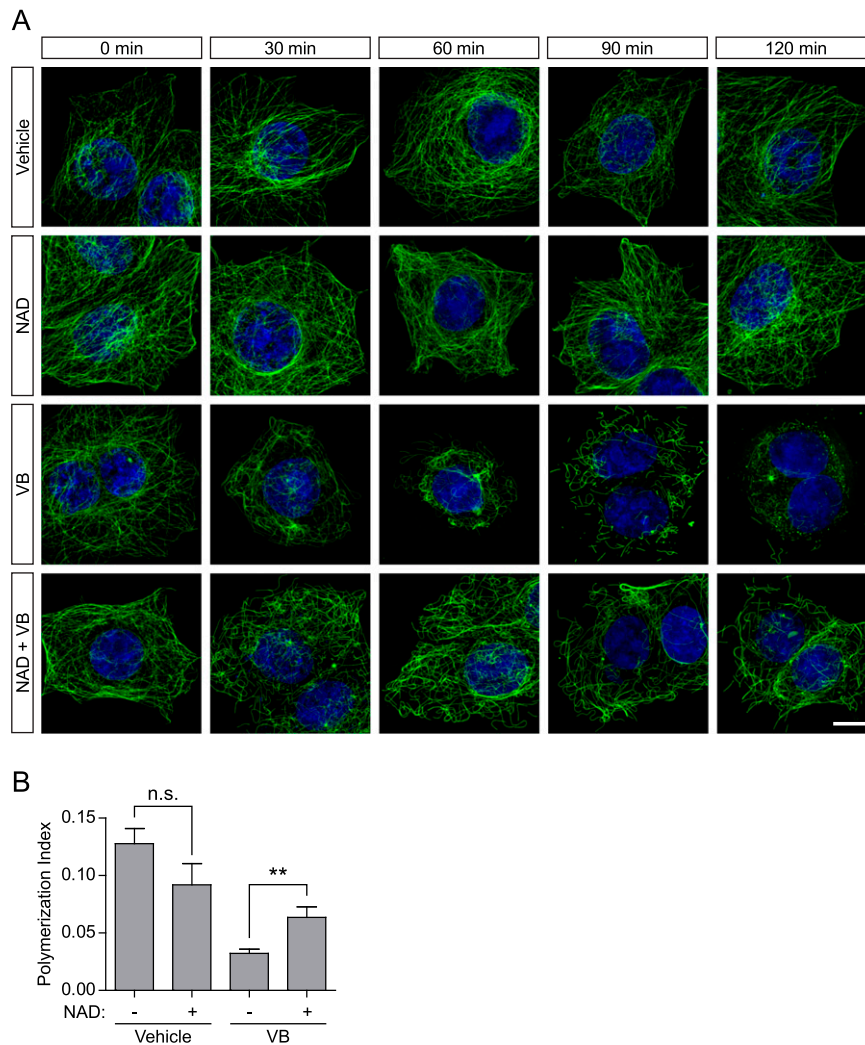

**Fig. S2.**  $\text{NAD}^+$  prevents the microtubule depolymerization effect of vinblastine. (A)  $\text{NAD}^+$  exhibits a microtubule-protective effect. This figure is identical to Fig. 1B, except more time points are included. As can be seen, treatment with  $\text{NAD}^+$  (5 mM) blocks the microtubule destabilizing effects of vinblastine (100 nM) in MCF-7 cells. Microtubule polymers were measured by anti-Tyr-tubulin immunostaining (green). (Scale bar, 10  $\mu\text{m}$ .) (B)  $\text{NAD}^+$  exhibits a microtubule-protective effect in multiple cell types. To confirm that our results were not unique to MCF-7 cells, we performed the same experiment in HEK293T cells. Cells treated with vinblastine (50 nM) exhibited a complete loss of microtubules by 2 h. Coapplication of  $\text{NAD}^+$  (5 mM), however, blocks the microtubule destabilizing effects of vinblastine. To quantify microtubule polymer mass, polymerized microtubules were identified and binarized using the Tubeness plugin in Fiji, which identifies linear structures. The total area of the cell was determined using an Alexa Fluor 568 Phalloidin counterstain, and the graph represents the ratio of microtubule polymers to cell area, which we refer to as the polymerization index. To remove background fluorescence caused by depolymerized tubulin, soluble tubulin was extracted before fixation. These results confirm that the microtubule protective effect of  $\text{NAD}^+$  is not specific to one cell type. We measured  $\sim 100$  cells from  $n = 3$  replicates. Bar graph represents mean  $\pm$  SEM; n.s. not significant;  $**P < 0.01$  (unpaired, two-tailed Student  $t$  test).

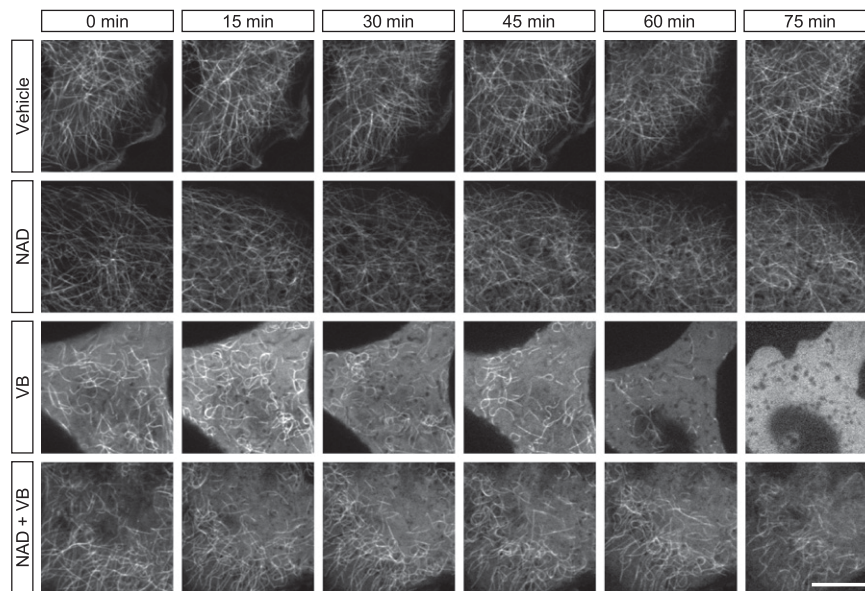

**Fig. S3.**  $\text{NAD}^+$  prevents the microtubule depolymerization effect of vinblastine. Live, time-lapse imaging of microtubules. To assess the ability of  $\text{NAD}^+$  to alter microtubule polymer stability, we monitored microtubules by live time-lapse imaging of MCF-7 cells stably expressing GFP- $\alpha$ -tubulin. In these experiments, cells were pretreated with  $\text{NAD}^+$  (5 mM) or vehicle (water) for 2 h, followed by time-lapse imaging for 90 min. In cells receiving vehicle treatment or  $\text{NAD}^+$  alone, there were no obvious changes in microtubule polymer mass throughout the time course. In cells receiving vinblastine (VB; 25 nM) treatment, an initial loss of microtubule polymers was observed even in the short time period ( $\sim 1$  min) between adding the vinblastine and beginning imaging. Complete microtubule depolymerization was seen by 75 min. However, in cells that received  $\text{NAD}^+$  treatment before the addition of vinblastine, we observed a significant protection of the microtubule polymer mass (Movies S1–S4). Taken together, these data indicate that  $\text{NAD}^+$  protects microtubules from depolymerization elicited by vinblastine. Time-lapse images were acquired every 15 s for 90 min using a spinning disk confocal microscope (100 $\times$  objective) equipped with an environmental chamber. Because of slight drift in the focal plane,  $\sim$ one representative image was selected for each minute of the time course for the final movies. In addition, time-lapse movies were bleach-corrected and background subtracted in Fiji. Finally, for the vinblastine treatment movie, slight movement in the  $x$ - $y$  plane was corrected using the warp-stabilizer function in After Effects (Adobe Systems). (Scale bar, 5  $\mu\text{m}$ .)









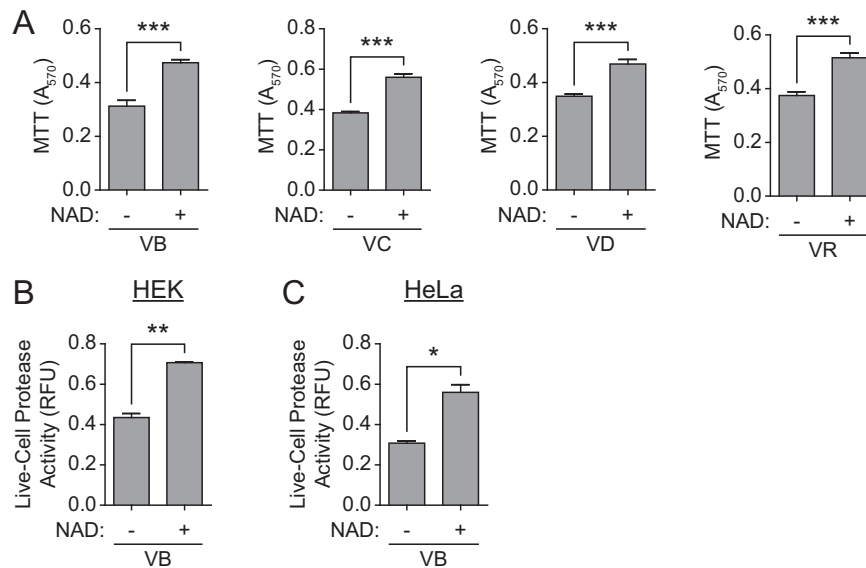

**Fig. S7.**  $\text{NAD}^+$  reduces the sensitivity of cells to vinblastine. (A)  $\text{NAD}^+$  antagonizes multiple microtubule-damaging agents. To confirm that our results are not specific to vinblastine, MCF-7 cells were treated with various microtubule damaging agents and viability was measured via an MTT assay. Treatment with vinblastine (100 nM; VB) caused a decrease in absorbance, a read-out of mitochondrial function and cell viability. When cells are treated with  $\text{NAD}^+$  (5 mM) at the time of vinblastine application, there is a significant increase in cell viability, consistent with our previous results (Fig. 6C). We see the same effect when cells are treated with the structurally distinct vinca alkaloids vincristine (100 nM; VC), vindesine (100 nM, VD), and vinorelbine (100 nM; VR). These data further support our hypothesis that  $\text{NAD}^+$  reduces the sensitivity of microtubule damaging agents. These data also further strengthen our hypothesis by using an alternative measure of cell viability. We measured ~10,000 cells per well in a 96-well plate from  $n = 3$  replicates. Bar graphs represent the mean  $\pm$  SEM normalized to vehicle or  $\text{NAD}^+$  control.  $***P < 0.001$  (unpaired, two-tailed Student  $t$  test). (B and C) Increased  $\text{NAD}^+$  levels reduce sensitivity to vinblastine in multiple cell types. To confirm that our results are not specific to MCF-7 cells, we measured cell viability in HEK293T (B) and HeLa cells (C) via live-cell protease activity. Treatment with vinblastine (10 nM) for 48 h caused a decrease in cell viability, as expected. When cells are treated with  $\text{NAD}^+$  (5 mM) at the time of vinblastine application, there is a significant increase in cell viability, consistent with our results in MCF-7 cells (Fig. 6C). These data demonstrate that increased  $\text{NAD}^+$  levels can reduce the sensitivity of cells to vinblastine. We measured ~10,000 cells per well in a 96-well plate from  $n = 3$  replicates. Each point represents the mean  $\pm$  SEM normalized to vehicle or  $\text{NAD}^+$  control.  $*P < 0.05$ ;  $**P < 0.01$  (unpaired, two-tailed Student  $t$  test).

**Table S1.  $\text{NAD}^+$  increases the dynamic instability of microtubules**

| Image parameter                                   | EB1-GFP expressing MCF-7 cells treated with: |                       | t test |
|---------------------------------------------------|----------------------------------------------|-----------------------|--------|
|                                                   | Vehicle                                      | $\text{NAD}^+$ (5 mM) |        |
| No. of videos                                     | 11                                           | 11                    |        |
| Growth speed ( $\mu\text{m}/\text{min}$ )         | $10.53 \pm 1.70$                             | $12.87 \pm 1.15$      | *      |
| Gap speed ( $\mu\text{m}/\text{min}$ )            | $4.93 \pm 0.87$                              | $6.15 \pm 0.66$       | *      |
| Segment growth speed ( $\mu\text{m}/\text{min}$ ) | $7.42 \pm 1.26$                              | $9.14 \pm 0.89$       | *      |
| Track growth time (s)                             | $8.11 \pm 0.67$                              | $9.18 \pm 0.65$       | NS     |
| Segment growth time (s)                           | $32.86 \pm 2.31$                             | $32.99 \pm 1.71$      | NS     |
| Gap time (s)                                      | $10.68 \pm 0.51$                             | $10.46 \pm 0.54$      | NS     |
| Time ratio gap/segment                            | $0.38 \pm 0.01$                              | $0.37 \pm 0.01$       | NS     |
| Shrink speed ( $\mu\text{m}/\text{min}$ )         | $8.85 \pm 2.01$                              | $11.16 \pm 1.55$      | *      |
| Shrink time (s)                                   | $16.11 \pm 0.71$                             | $16.57 \pm 0.77$      | NS     |
| Gaps per segment                                  | $1.29 \pm 0.05$                              | $1.28 \pm 0.04$       | NS     |
| Shrink time (%)                                   | $0.23 \pm 0.04$                              | $0.30 \pm 0.04$       | *      |
| Shrink probability (%)                            | $0.31 \pm 0.04$                              | $0.39 \pm 0.03$       | *      |

EB1-GFP comets were analyzed using ClusterTrack. Segments are groups of growth tracks and gaps separated by a shrink event. Values represent the mean  $\pm$  SD. Significance was determined using a one-tailed permutation  $t$  test of the means of the per cell numbers (200 repetitions).  $*P < 0.05$ ; NS not significant.

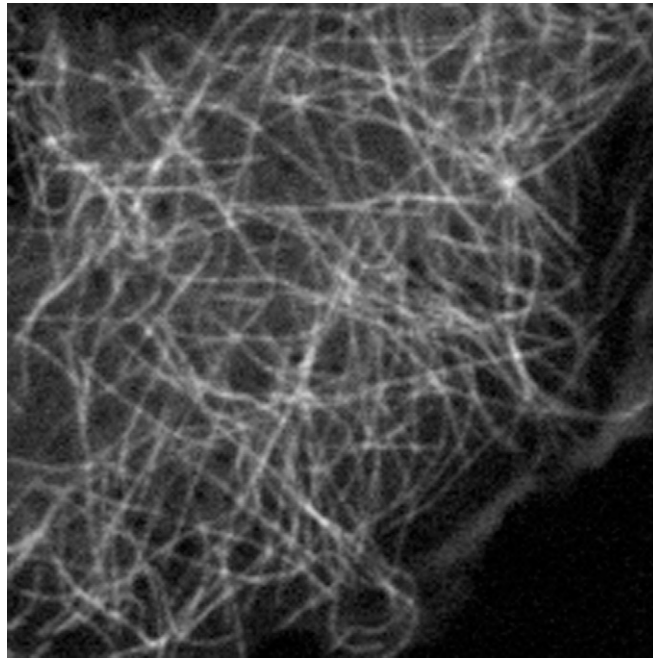

**Movie S1.**  $\text{NAD}^+$  prevents the microtubule depolymerization effect of vinblastine. To assess the ability of  $\text{NAD}^+$  to alter microtubule polymer stability, we monitored microtubules by live time-lapse imaging of MCF-7 cells stably expressing GFP- $\alpha$ -tubulin. In these experiments, cells were pretreated with  $\text{NAD}^+$  (5 mM) or vehicle (water) for 2 h, followed by time-lapse imaging for 90 min. In cells receiving vehicle treatment there were no obvious changes in microtubule polymer mass throughout the time course. Taking the data from [Movies S1–S4](#) together, we find that these data indicate that  $\text{NAD}^+$  protects microtubules from depolymerization elicited by vinblastine. Time-lapse images were acquired every 15 s for 90 min using a spinning disk confocal microscope (100 $\times$  objective) equipped with an environmental chamber. Because of slight drift in the focal plane, ~one representative image was selected for each minute of the time course for the final movies. In addition, time-lapse movies were bleach-corrected and background subtracted in Fiji. Single images from the time-lapse movies are shown in Fig. S3 to facilitate comparisons.

[Movie S1](#)

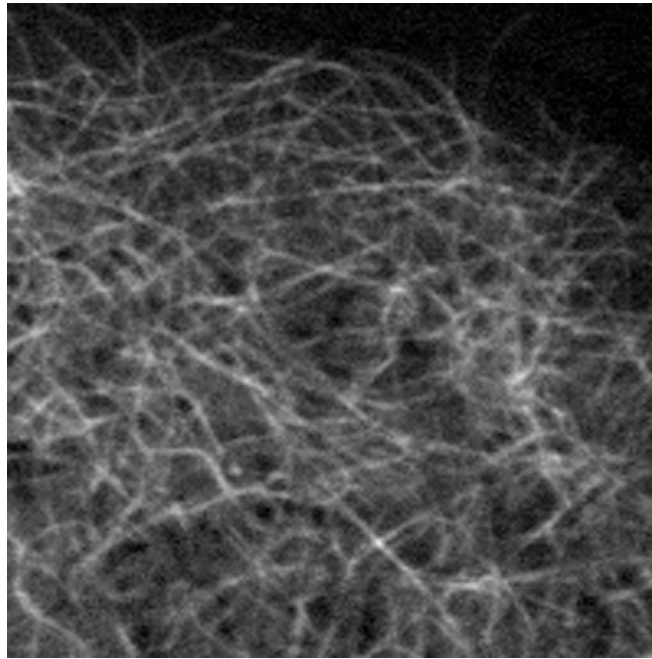

**Movie S2.**  $\text{NAD}^+$  prevents the microtubule depolymerization effect of vinblastine. To assess the ability of  $\text{NAD}^+$  to alter microtubule polymer stability, we monitored microtubules by live time-lapse imaging of MCF-7 cells stably expressing GFP- $\alpha$ -tubulin. In these experiments, cells were pretreated with  $\text{NAD}^+$  (5 mM) or vehicle (water) for 2 h, followed by time-lapse imaging for 90 min. Taken together, the data from these four experiments indicate that  $\text{NAD}^+$  protects microtubules from depolymerization elicited by vinblastine. Time-lapse images were acquired every 15 s for 90 min using a spinning disk confocal microscope (100 $\times$  objective) equipped with an environmental chamber. Because of slight drift in the focal plane, ~one representative image was selected for each minute of the time course for the final movies. In addition, time-lapse movies were bleach-corrected and background subtracted in Fiji. Single images from the time-lapse movies are shown in Fig. S3 to facilitate comparisons.

[Movie S2](#)

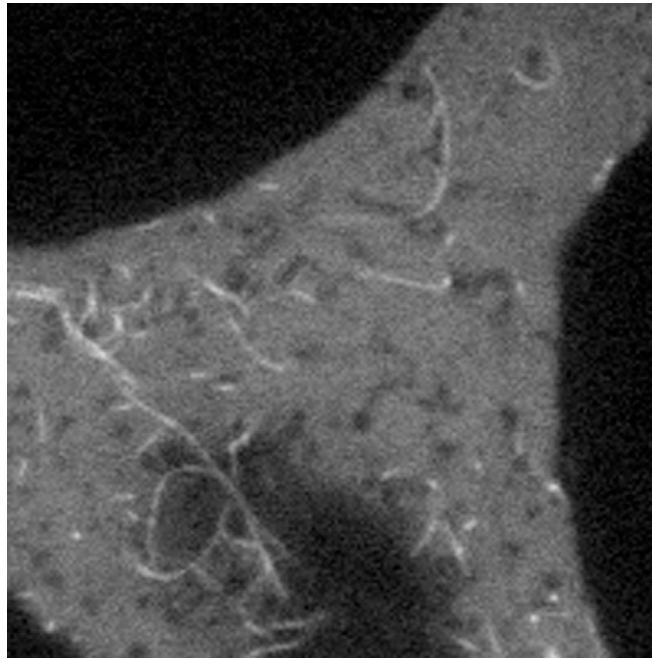

**Movie S3.**  $\text{NAD}^+$  prevents the microtubule depolymerization effect of vinblastine. To assess the ability of  $\text{NAD}^+$  to alter microtubule polymer stability, we monitored microtubules by live time-lapse imaging of MCF-7 cells stably expressing GFP- $\alpha$ -tubulin. In these experiments, cells were pretreated with  $\text{NAD}^+$  (5 mM) or vehicle (water) for 2 h, followed by time-lapse imaging for 90 min. In cells receiving vinblastine (VB; 25 nM) treatment, an initial loss of microtubule polymers was observed even in the short time period (~1 min) between adding the vinblastine and beginning imaging. Complete microtubule depolymerization was seen by 75 min. Taken together, the data from these four experiments indicate that  $\text{NAD}^+$  protects microtubules from depolymerization elicited by vinblastine. Time-lapse images were acquired every 15 s for 90 min using a spinning disk confocal microscope (100 $\times$  objective) equipped with an environmental chamber. Because of slight drift in the focal plane, ~one representative image was selected for each minute of the time course for the final movies. In addition, time-lapse movies were bleach-corrected and background subtracted in Fiji. Finally, for the vinblastine-treatment movie, slight movement in the  $x$ - $y$  plane was corrected using the warp-stabilizer function in After Effects (Adobe Systems). Single images from the time-lapse movies are shown in Fig. S3 to facilitate comparisons.

[Movie S3](#)

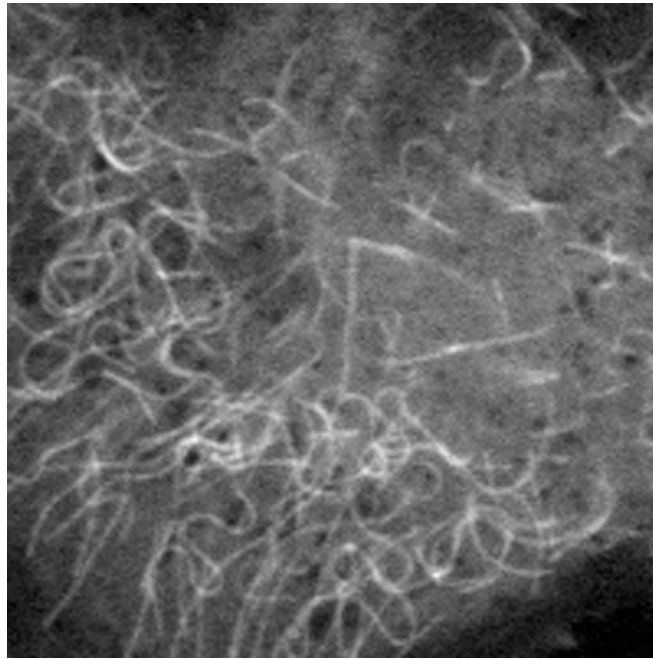

**Movie S4.**  $\text{NAD}^+$  prevents the microtubule depolymerization effect of vinblastine. To assess the ability of  $\text{NAD}^+$  to alter microtubule polymer stability, we monitored microtubules by live time-lapse imaging of MCF-7 cells stably expressing GFP- $\alpha$ -tubulin. In these experiments, cells were pretreated with  $\text{NAD}^+$  (5 mM) or vehicle (water) for 2 h, followed by time-lapse imaging for 90 min. In cells receiving that received  $\text{NAD}^+$  treatment before the addition of vinblastine, we observed a significant protection of the microtubule polymer mass. Taken together, the data from the experiments shown in [Movies S1–S4](#) indicate that  $\text{NAD}^+$  protects microtubules from depolymerization elicited by vinblastine. Time-lapse images were acquired every 15 s for 90 min using a spinning disk confocal microscope (100 $\times$  objective) equipped with an environmental chamber. Because of slight drift in the focal plane, ~one representative image was selected for each minute of the time course for the final movies. In addition, time-lapse movies were bleach-corrected and background subtracted in Fiji. For the vinblastine-treatment movie, slight movement in the  $x$ - $y$  plane was corrected using the warp-stabilizer function in After Effects (Adobe Systems). Single images from the time-lapse movies are shown in Fig. S3 to facilitate comparisons.

[Movie S4](#)
